# Supplementary material
Source: PubMed Central journal article supplement (PMC3107050)
Supplement: d-67-00524-sup1.pdf [file d-67-00524-sup1.pdf]

## Supplementary Material

**Supplementary Table 1.** List of currently available HIV-1 protease apo-protein structures.

| PDB entry | Resolution (Å) | Space group | No. of mutations | Remarks    |
|-----------|----------------|-------------|------------------|------------|
| 2HVP      | 3.0            | $P4_12_12$  | 0                | Wild type  |
| 3HVP      | 2.8            | $P4_12_12$  | 6                | 2X mutant  |
| 3PHV      | 2.7            | $P4_12_12$  | 1                | Wild type  |
| 1HHP      | 2.7            | $P4_12_12$  | 1                | Wild type  |
| 1GL6      | 1.9            | $P6_1$      | 3                | Wild type  |
| 1LV1      | 2.1            | $P6_1$      | 3                | Wild type  |
| 1Q9P      | N/A            | NMR         | 5                | Wild type  |
| 1RPI      | 1.86           | $P4_1$      | 10               | 9X mutant  |
| 1TW7      | 1.3            | $P4_1$      | 11               | 10X mutant |
| 2G69      | 1.35           | $P4_12_12$  | 6                | 1X mutant  |
| 2HB2      | 2.3            | $P4_12_12$  | 7                | 6X mutant  |
| 2HB4      | 2.15           | $P4_12_12$  | 1                | Wild type  |

N/A - Not available

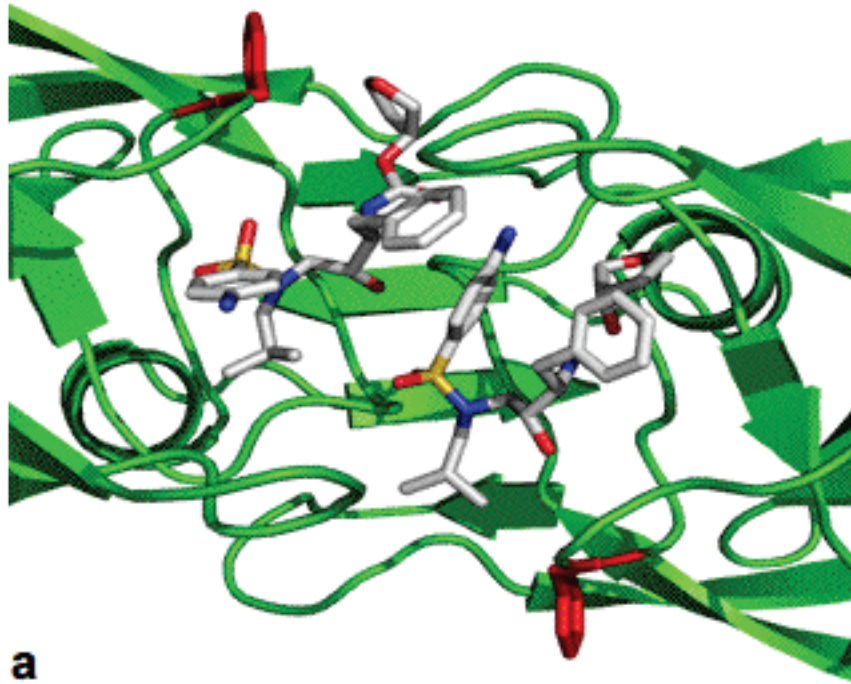

**a**

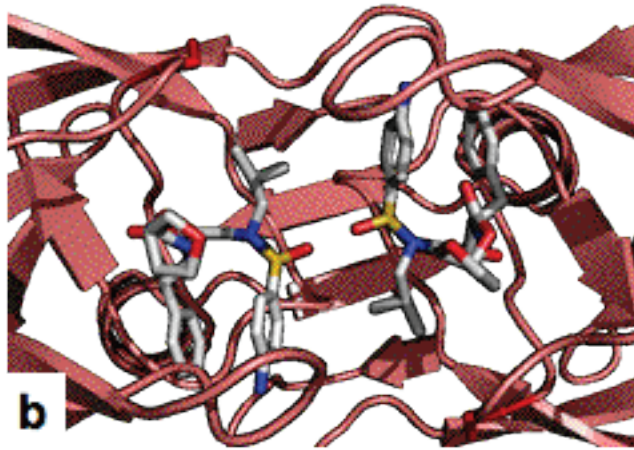

**b**

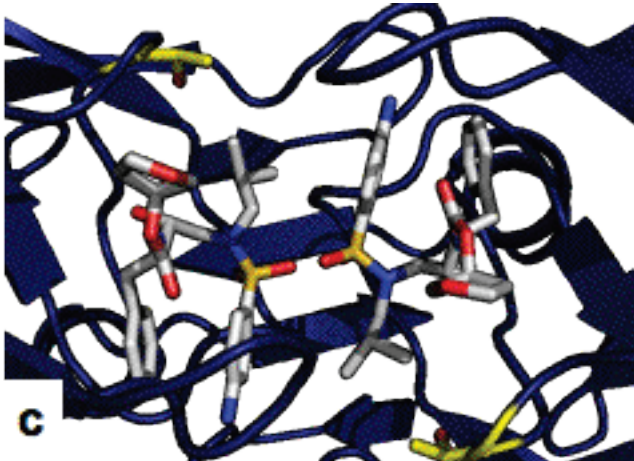

**c**

**Supplementary Figure 1.** Docking studies with amprenavir. Shown here are the docked models of MDR769 HIV-1 protease variants. (a) A82F mutant shown in green with Phe82 highlighted as red stick model. (b) A82S mutant shown in light pink with Ser82 highlighted as red stick model. (c) A82T mutant shown in dark blue with Thr82 highlighted as yellow stick model. Each model shows two molecules of amprenavir (white color stick representation) docked into the expanded active site cavity without steric clashes suggesting the conserved trend of expanded active site cavity among the variants.
